# Supplementary material
Source: publisher figshare collection journal article supplement (https://karger.figshare.com/ndownloader/files/25659341)
Supplement: Supplementary file 1 [file 25659341]

**Supplementary Table 3.** Estimated survival at different time points for NET G3, NEC <55 and NEC ≥55

|  | NET G3 | NEC <55 | NEC ≥55 |
| --- | --- | --- | --- |
| 12 months | 87.5 | 47.4 | 41.8 |
| 24 months | 58.3 | 21.1 | 23.5 |
| 36 months | 49.7 | 10.5 | 10.9 |
| 60 months | 36.1 | 7.0 | 6.5 |
| 72 months | 24.8 | 5.3 | 6.5 |
|  |  |  |  |

The estimates, in percent, are calculated over full data and evaluated at indicated times
